# Supplementary material for: Biocompatibility and photo-induced antibacterial activity of lignin-stabilized noble metal nanoparticles
Source: PubMed Central journal article supplement — RSC Adv. 2018 Dec 4;8(70):40454–63. doi: 10.1039/c8ra08169g (PMC9091494; doi:10.1039/c8ra08169g), 2018-12-04
Supplement: RA-008-C8RA08169G-s001.pdf [file RA-008-C8RA08169G-s001.pdf]

## Supporting Information

### **Biocompatibility and photo-induced antibacterial activity of lignin-stabilized noble metal nanoparticles**

Diamela Rocca<sup>a,b</sup>, Julie P. Vanegas<sup>†a,c</sup>, Kelsey Fournier<sup>†a</sup>, M. Cecilia Becerra<sup>b</sup>, Juan C. Scaiano<sup>a</sup> and Anabel E. Lanterna<sup>\*a</sup>

#### **Table of Content**

|                                                                       |     |
|-----------------------------------------------------------------------|-----|
| Synthesis and characterization of MNP@lignin.....                     | S2  |
| Calculation of the NP concentration.....                              | S7  |
| Stability of MNP@lignin composites in different biological media..... | S8  |
| Antimicrobial activity .....                                          | S10 |
| ROS production.....                                                   | S12 |
| Cell viability.....                                                   | S13 |

## Synthesis and characterization of MNP@lignin

In order to select the best conditions for the synthesis of MNP@lignin, different methods were screened for the thermal- and photo-synthesis of nanocomposites utilizing alkali lignin. Table S1 summarized different conditions studied.

Table S1. Synthesis conditions screened for MNP@Alkali composites.

| (Metal precursor/lignin) <sup>a</sup> | Irradiation conditions | T (°C) | t (min) |
|---------------------------------------|------------------------|--------|---------|
| 10, 5, 1, 0.1                         | Dark                   | 55-60  | 10      |
| 10, 5, 2, 1, 0.5, 0.2, 0.1            | 400                    | 25     | 20      |
| 10, 5, 2, 1, 0.5, 0.2, 0.1            | 465                    | 28     | 20      |
| 5, 1, 0.5, 0.1                        | 530                    | 28     | 20      |
| 10, 5, 2, 1, 0.5, 0.2, 0.1            | 730                    | 25     | 20      |

<sup>a</sup> mg of precursor salt (AgNO<sub>3</sub> or HAuCl<sub>4</sub>) per mg of lignin, for a total amount of 0.1 mg lignin per mL.

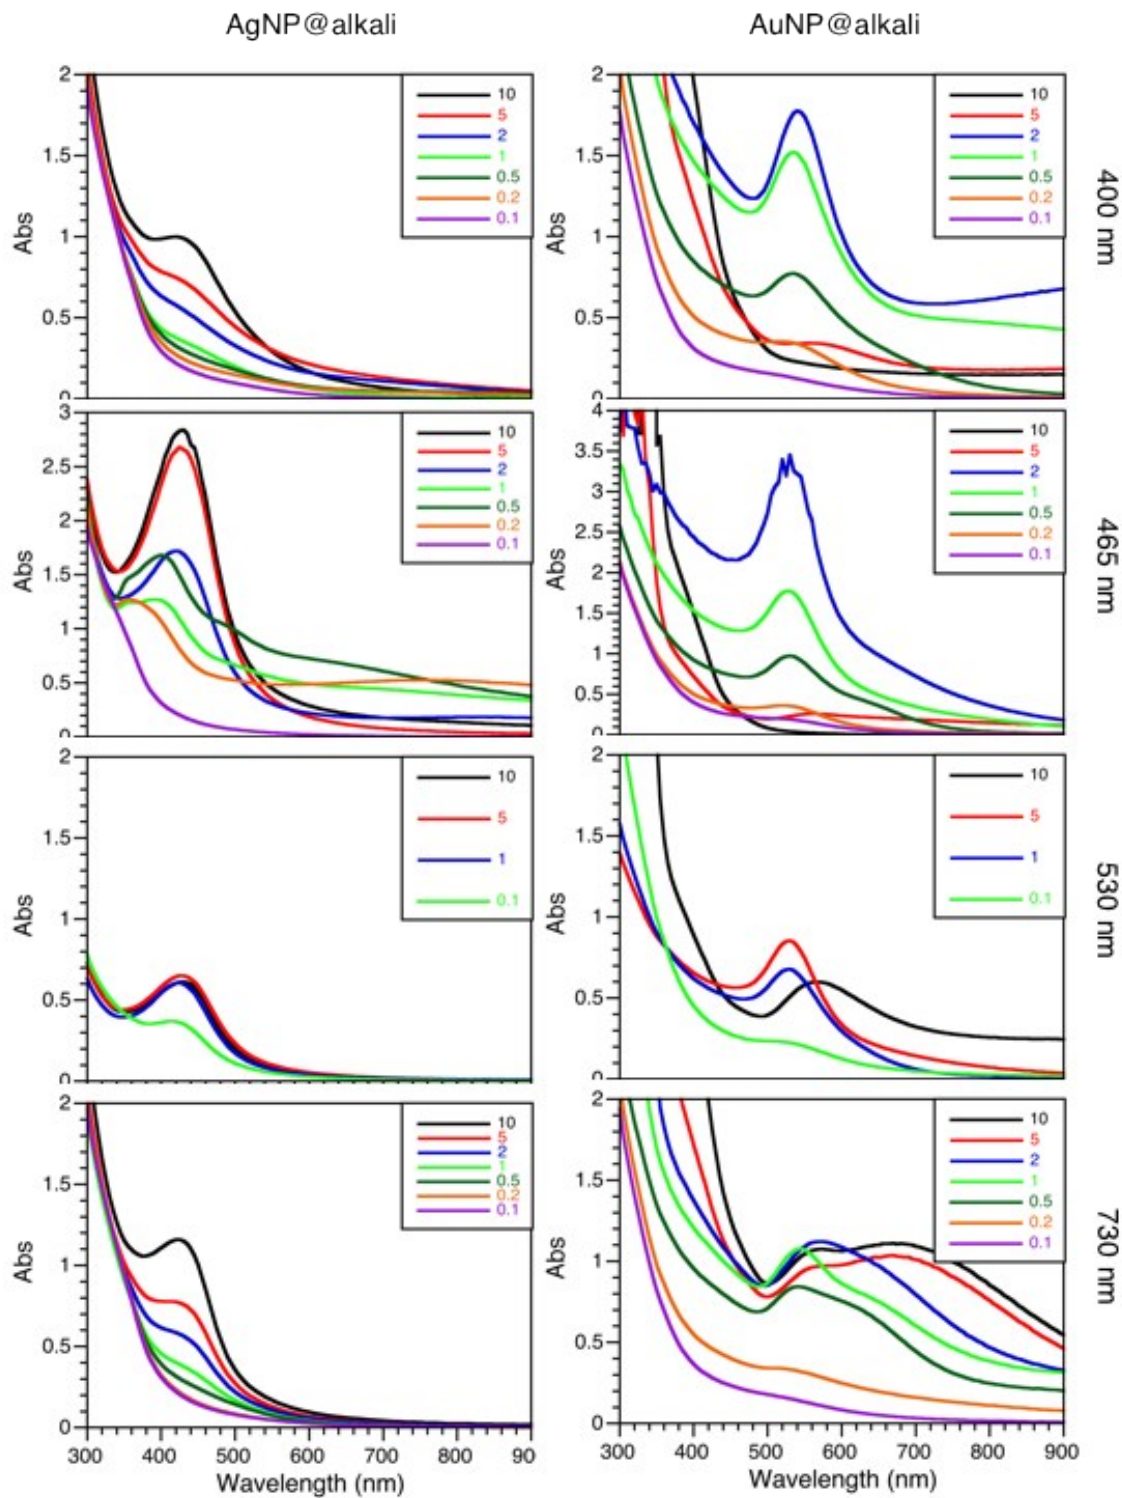

Figure S 1. UV-Vis absorption spectra of MNP@alkali solutions obtained by irradiation with different wavelengths.

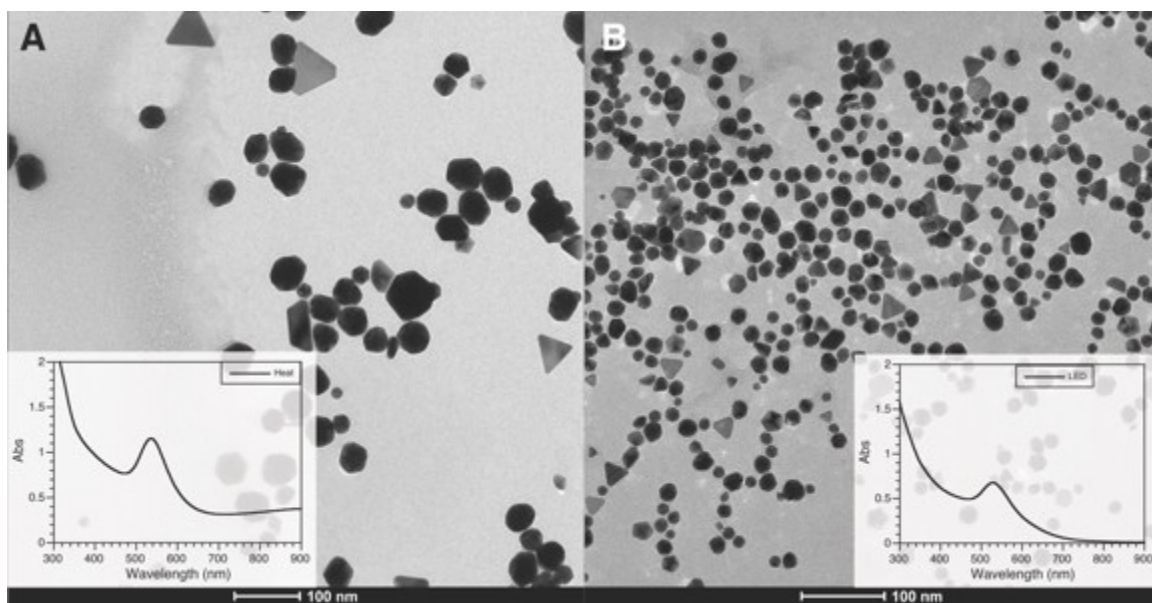

Figure S 2. TEM images of the AuNP@Alkali synthesized following protocols described in table S1: A) thermal reaction, HAuCl<sub>4</sub>/lignin = 1; B) photochemical reaction, HAuCl<sub>4</sub>/lignin = 0.5(530 nm irradiation). Scale bar: 100 nm.

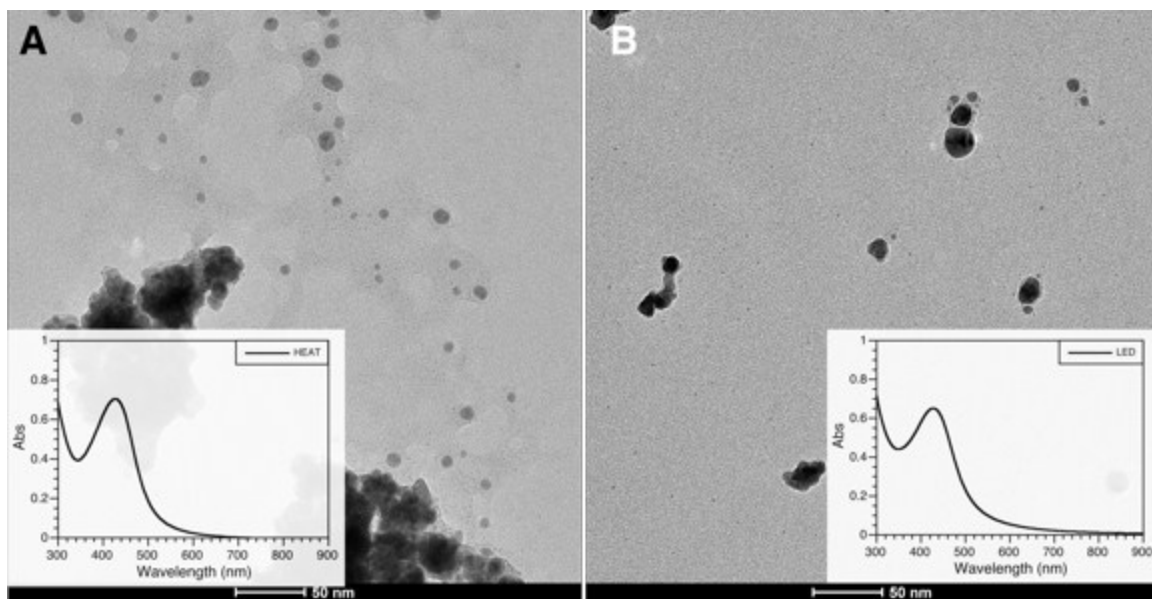

Figure S 3. TEM images of the AgNP@Alkali synthesized following protocols described in table S1: A) thermal reaction, AgNO<sub>3</sub>/lignin = 10 B) photochemical reaction, AgNO<sub>3</sub>/lignin = 5 (465 nm irradiation). Scale bar: 50 nm.

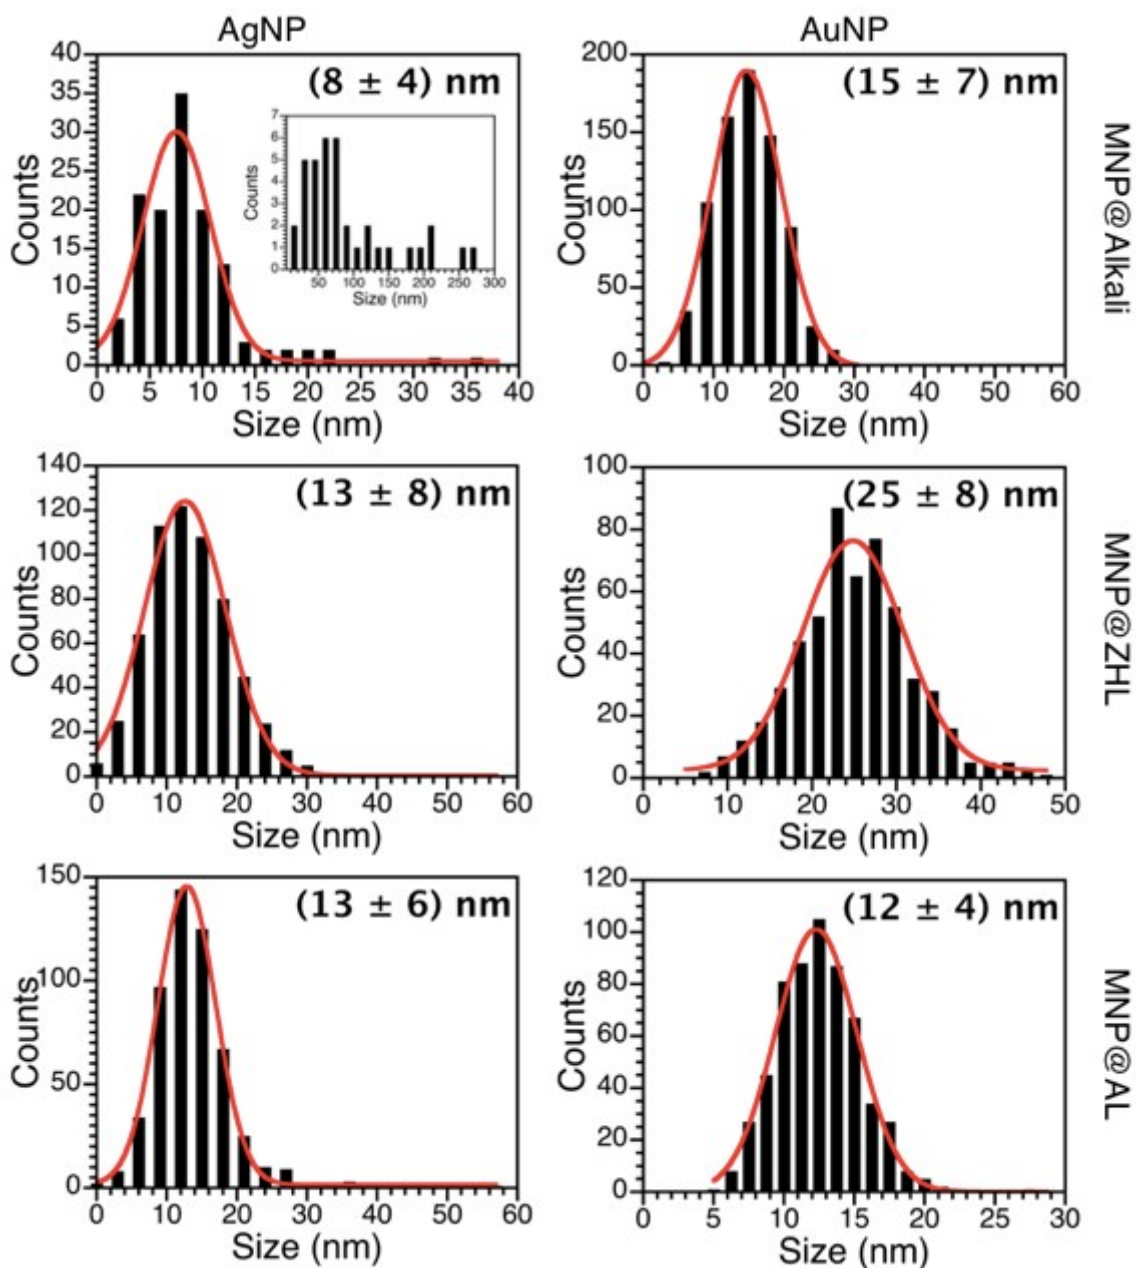

Figure S 4. Particle size distribution for the MNP@lignin nanocomposites determined by measuring 200-400 nanoparticles from different TEM images.

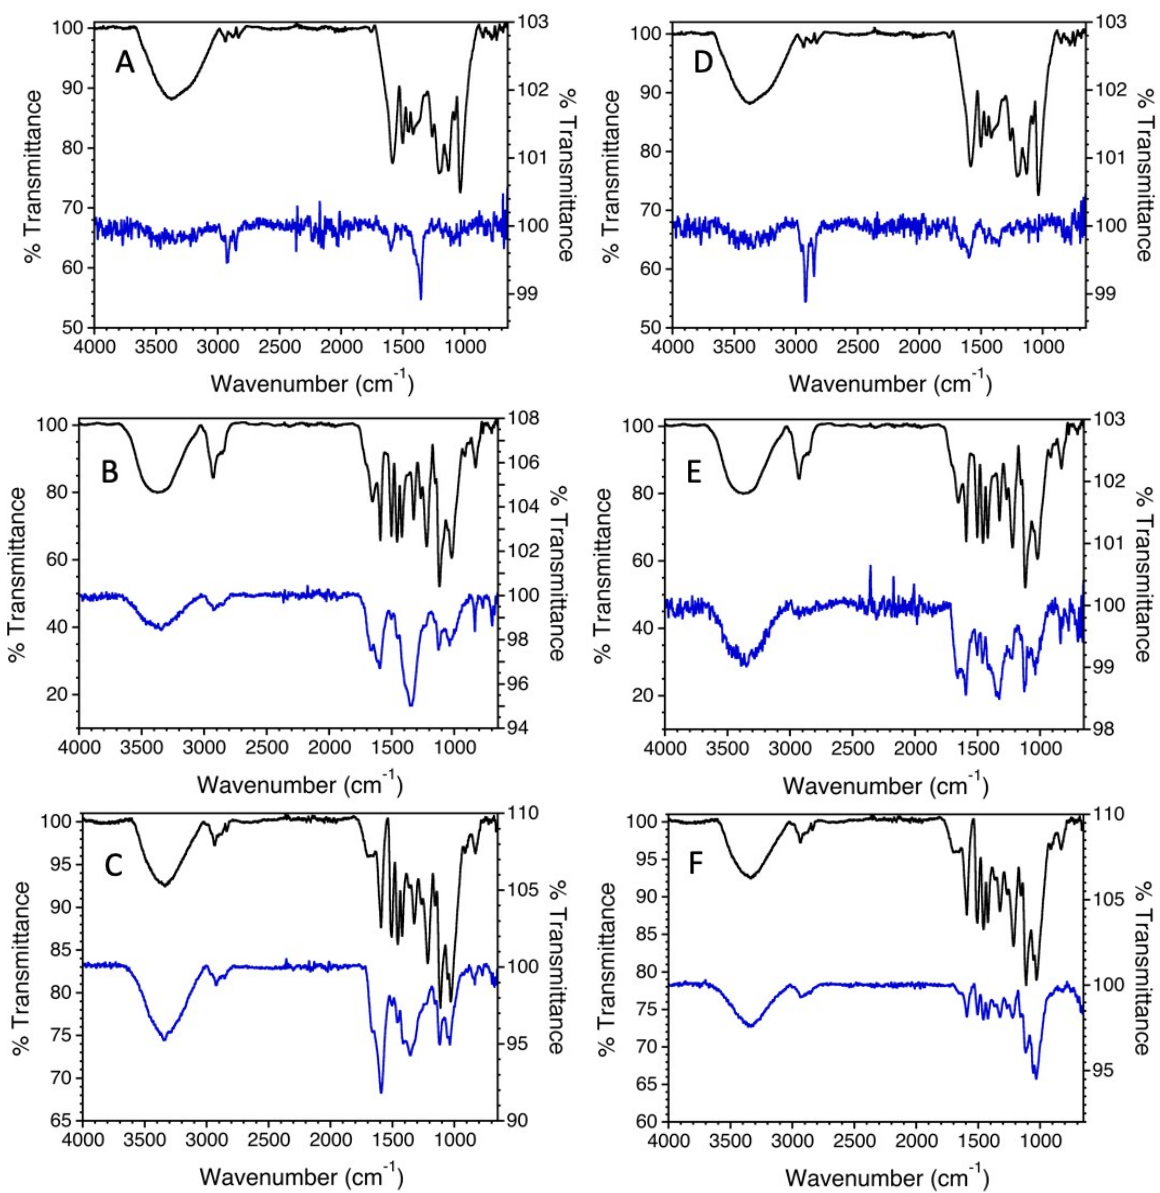

Figure S 5. ATR FT-IR spectra of the lignin alone (black) and the MNP@lignin composites (blue). (A) AgNP@alkali, (B) AgNP@AL, (C) AgNP@ZHL, (D) AuNP@alkali, (E) AuNP@AL and (F) AuNP@ZHL.

### Calculation of the NP concentration

The particle concentration was calculated based on the following assumptions: i) the MNP are perfectly spherical and ii) the size distribution is monodisperse. Based on the previously reported methodology<sup>1</sup> we used equation 1 to determine the number of atoms per NP:

$$N = \left( \frac{R_{NP}}{r_A} \right)^3 \quad (1)$$

where  $R_{NP}$  is the NP radius (average radius determined by TEM imaging) and  $r_A$  is the covalent atomic radius of the metal (0.144 nm for Au and 0.153 nm for Ag). The NP concentration can be estimated by equation 2:

$$C_{NP} = \frac{N_{NP}}{N_A} = \frac{N_{atoms}}{N \times N_A} = \frac{\text{moles } Au^{3+} \text{ (or } Ag^+) \times N_A}{l} \times \frac{1}{N \times N_A} \quad (2)$$

The total amount of Au or Ag was determined by ICP.



## Stability of MNP@lignin composites in different biological media

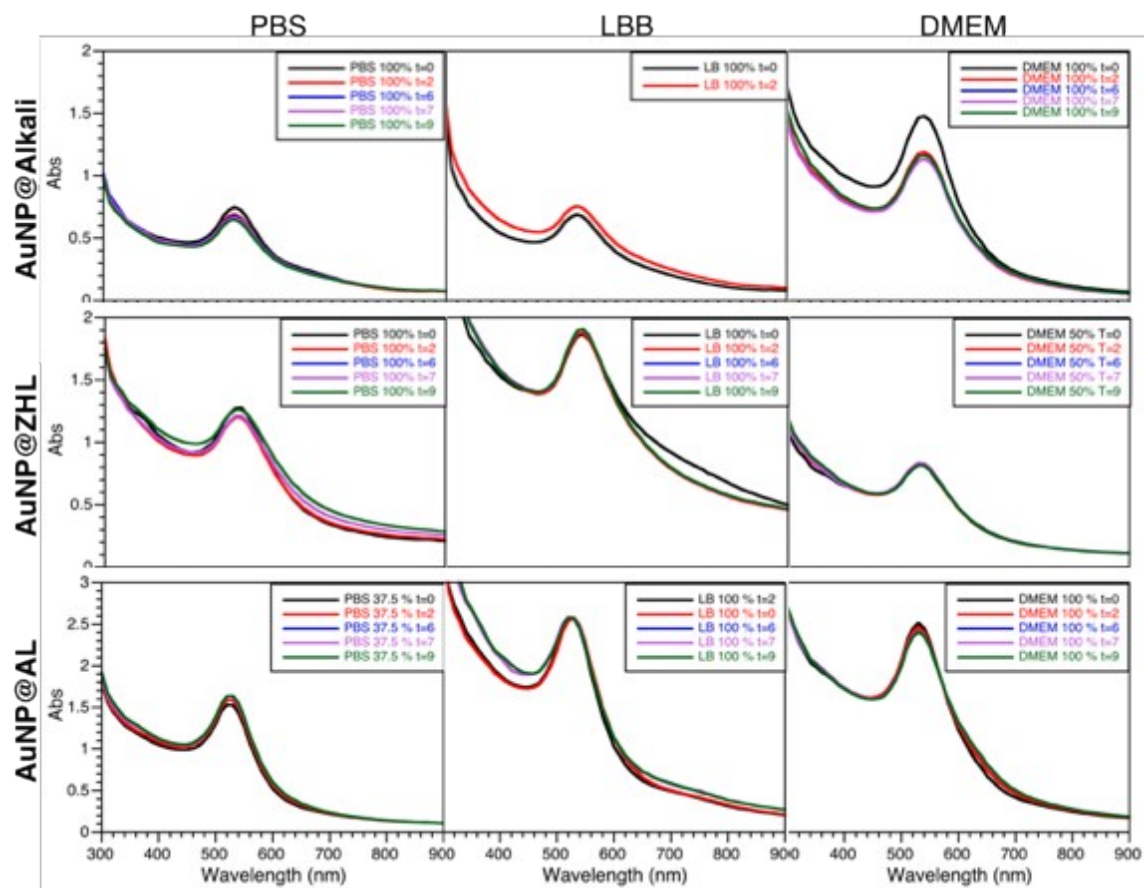

Figure S 6. Time evolution of UV-Vis spectra of different AuNP@lignin dispersed in different biological media.



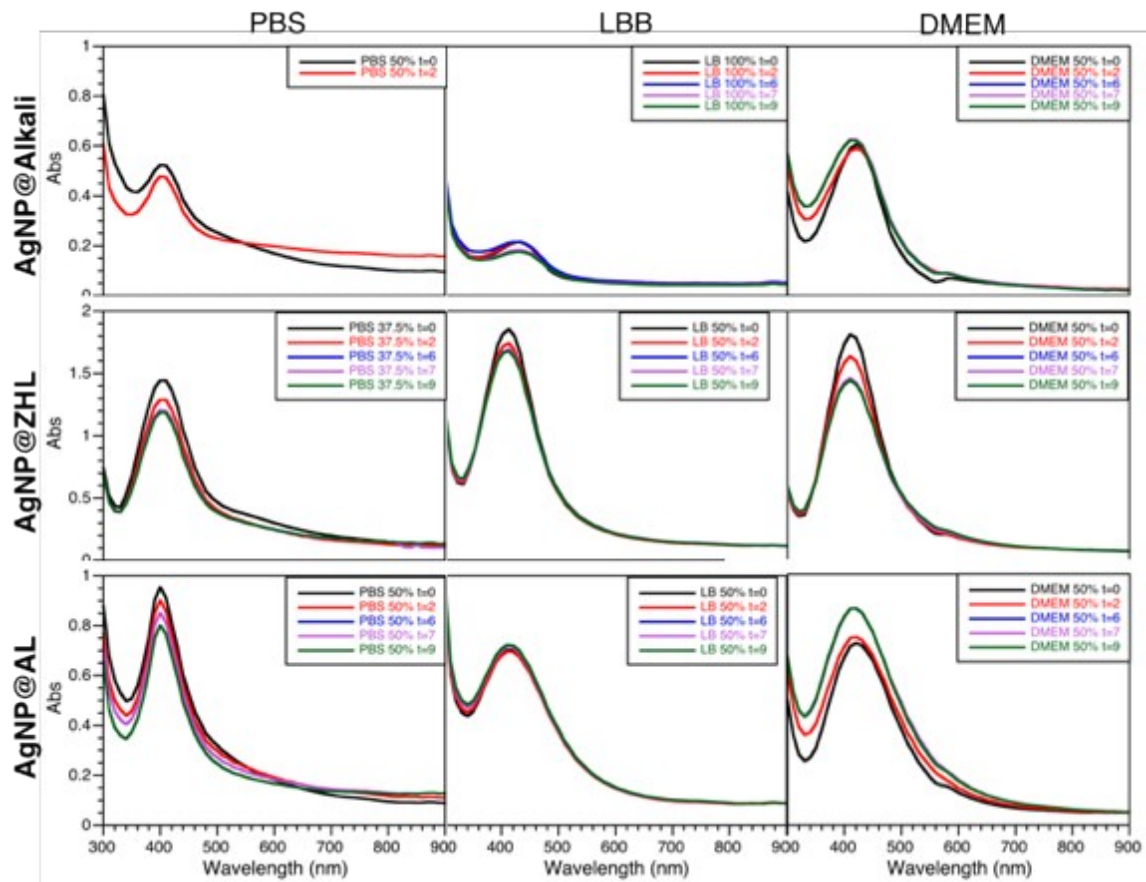

Figure S 7. Time evolution of UV-Vis spectra of different AgNP@lignin dispersed in different biological media.

## Antimicrobial activity

Table S2. Different concentrations used to determine the antimicrobial activity of MNP@lignin composites expressed in  $\mu\text{g}$  of metal per mL and in nM of MNP.

| MNP@lignin  | <sup>a</sup> A ( $\mu\text{g/mL}$ ) | B ( $\mu\text{g/mL}$ ) | A (nM)            | B (nM)            | Lignin loading (wt%) <sup>b</sup> |
|-------------|-------------------------------------|------------------------|-------------------|-------------------|-----------------------------------|
| AuNP@Alkali | 223                                 | 22                     | 8.0               | 0.8               | 53                                |
| AuNP@ZHL    | 337                                 | 34                     | 2.6               | 0.26              | 16                                |
| AuNP@AL     | 499                                 | 50                     | 35.0              | 3.5               | 23                                |
| AgNP@Alkali | 0.2                                 | 0.1                    | 0.03 <sup>c</sup> | 0.02 <sup>d</sup> | 98                                |
| AgNP@ZHL    | 19                                  | 9                      | 9.8               | 4.9               | 88                                |
| AgNP@AL     | 24                                  | 12                     | 2.9 <sup>c</sup>  | 1.5 <sup>d</sup>  | 98 <sup>e</sup>                   |

<sup>a</sup> Determined by ICP-OES measurements. <sup>b</sup> Values obtained assuming spherical volume of the core MNP (diameter calculated from TEM imaging) and shell (hydrodynamic volume calculated from DLS). <sup>c</sup>MIC <sup>d</sup>SubMIC. Based on amount of Ag. Reported MIC for  $\text{HAuCl}_4$  is around  $0.2 \mu\text{g/mL}$ .<sup>2</sup> Tested MIC for  $\text{AgNO}_3$  is  $4.1 \mu\text{g/mL}$  (based on silver content). <sup>e</sup> Bottom wt% silver content considering particle aggregation can reduce this number.

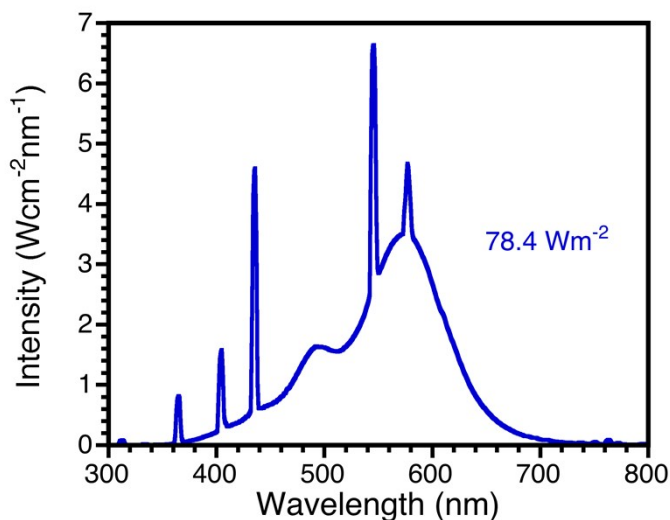

Figure S 8. Emission spectrum of the white light lamps used for illumination. Total irradiance  $\sim 78 \text{ Wm}^{-2}$ .

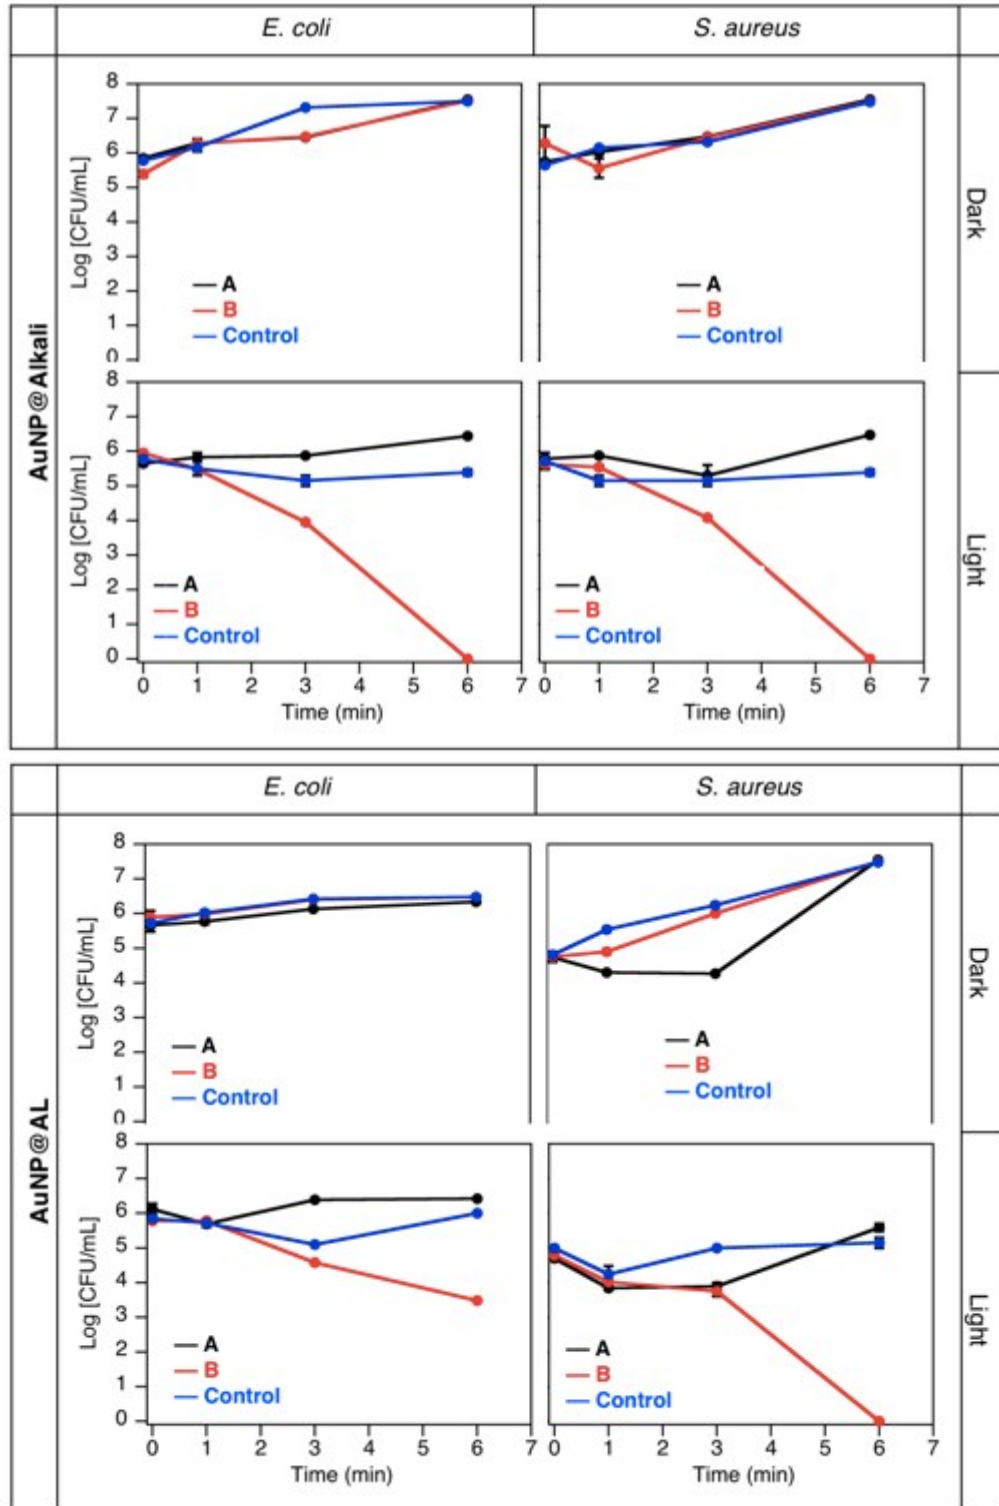

Figure S 9. Bacteria time-kill profiles for *E. coli* and *S. aureus* up to 6 h in the presence of AuNP@alkali and AuNP@AL at A and B concentrations given in table S3.

## ROS production

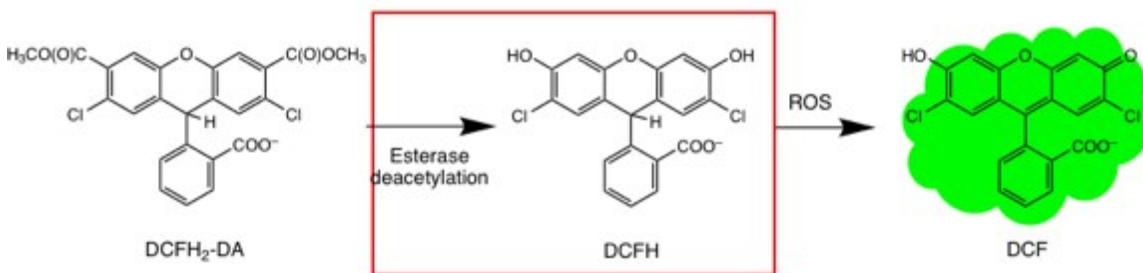

Figure S 10. 2,7-dichlorodihydrofluorescein diacetate (DCFH<sub>2</sub>-DA) undergoes deacetylation, in the presence of bacteria esterase (red box). Consecutive oxidation with ROS generate a highly fluorescent molecule (DCF).

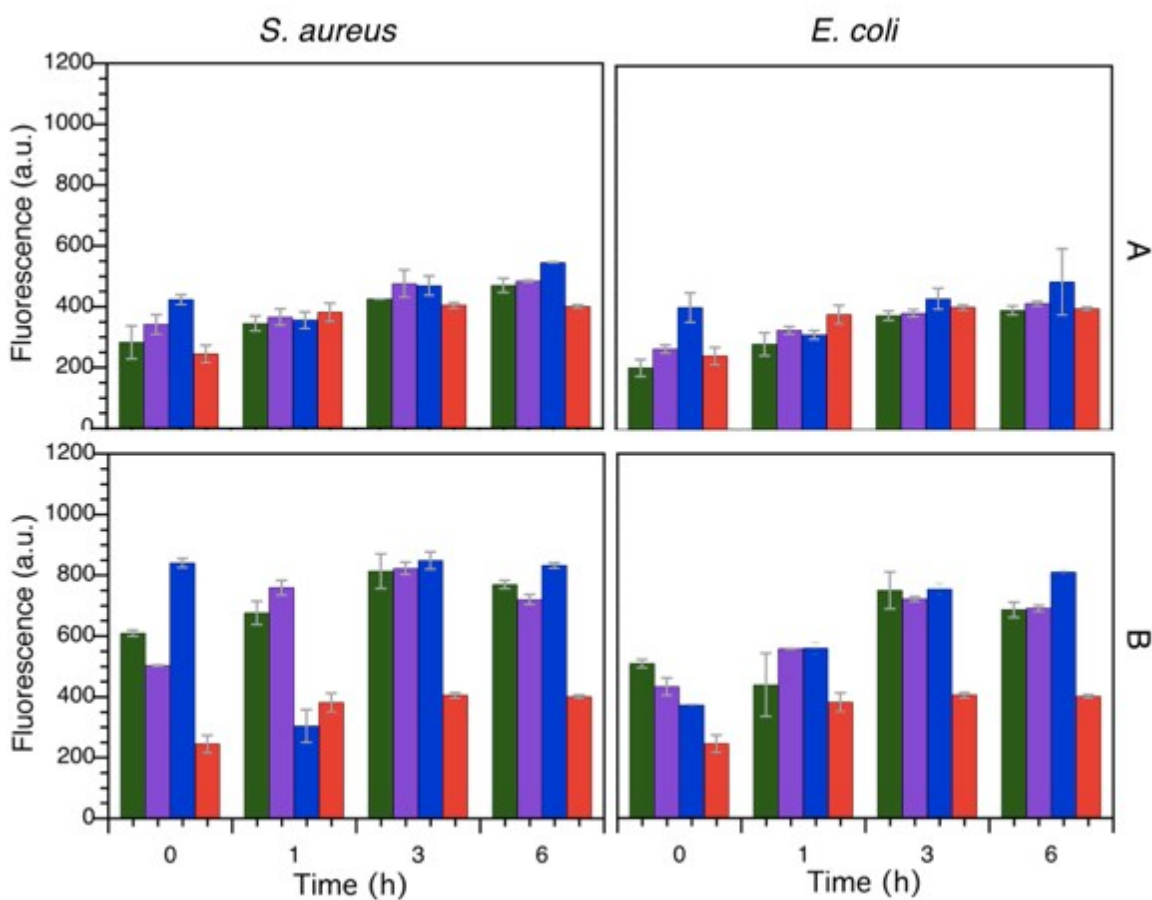

Figure S 11. ROS production for samples of *S. aureus* and *E. coli* phototreated with white light in the presence of AuNP@alkali (green), AuNP@AL (purple), AuNP@ZHL (blue), and in the absence of particles (red) at concentrations A and B given in table S3.

## Cell viability

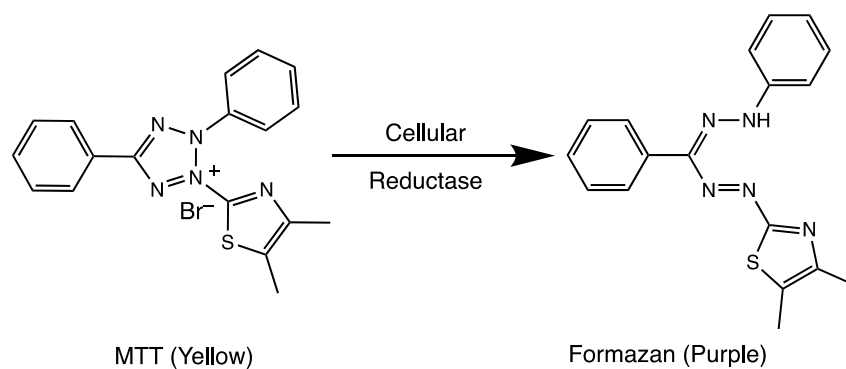

Figure S 12. MTT assay based on the reduction of tetrazolium salt to formazan (absorbance at 570 nm) in living cells.

## REFERENCES

1. Pacioni, N. L.; Gonzalez-Bejar, M.; Alarcon, E.; McGilvray, K. L.; Scaiano, J. C., Surface Plasmons Control the Dynamics of Excited Triplet States in the Presence of Gold Nanoparticles *J. Am. Chem. Soc.* **2010**, 132, 6298.
2. Shareena Dasari, T. P.; Zhang, Y.; Yu, H., Antibacterial Activity and Cytotoxicity of Gold (I) and (III) Ions and Gold Nanoparticles *Biochem. Pharmacol.* **2015**, 4.
